# Supplementary material for: Subcritical Extracts from Major Species of Oil-Bearing Roses—A Comparative Chemical Profiling
Source: MDPI journal article supplement (doi:10.3390/molecules26164991), 2021-08-18

## Subcritical Extracts from Major Species of Oil-Bearing Roses - A Comparative Chemical Profiling

A. Dobрева<sup>1</sup>, D. Nedeltcheva-Antonova<sup>2\*</sup>, N. Nenov<sup>3</sup>, K. Getchovska<sup>2</sup> and L. Antonov<sup>4</sup>

<sup>1</sup> Institute of Roses and Aromatic Plants, Agricultural Academy, 6100 Kazanlak, Bulgaria

<sup>2</sup> Institute of Organic Chemistry with Centre of Phytochemistry, Bulgarian Academy of Sciences, 1113 Sofia, Bulgaria

<sup>3</sup> University of Food Technologies, Department of Heat Engineering, Technical Faculty, 4002 Plovdiv, Bulgaria

<sup>4</sup> Institute of Electronics, Bulgarian Academy of Sciences, 1784 Sofia, Bulgaria

\*Corresponding author, E-mail: Daniela.Antonova@orgchm.bas.bg

Figure S1. Rose species blossom.

a) *R. alba*

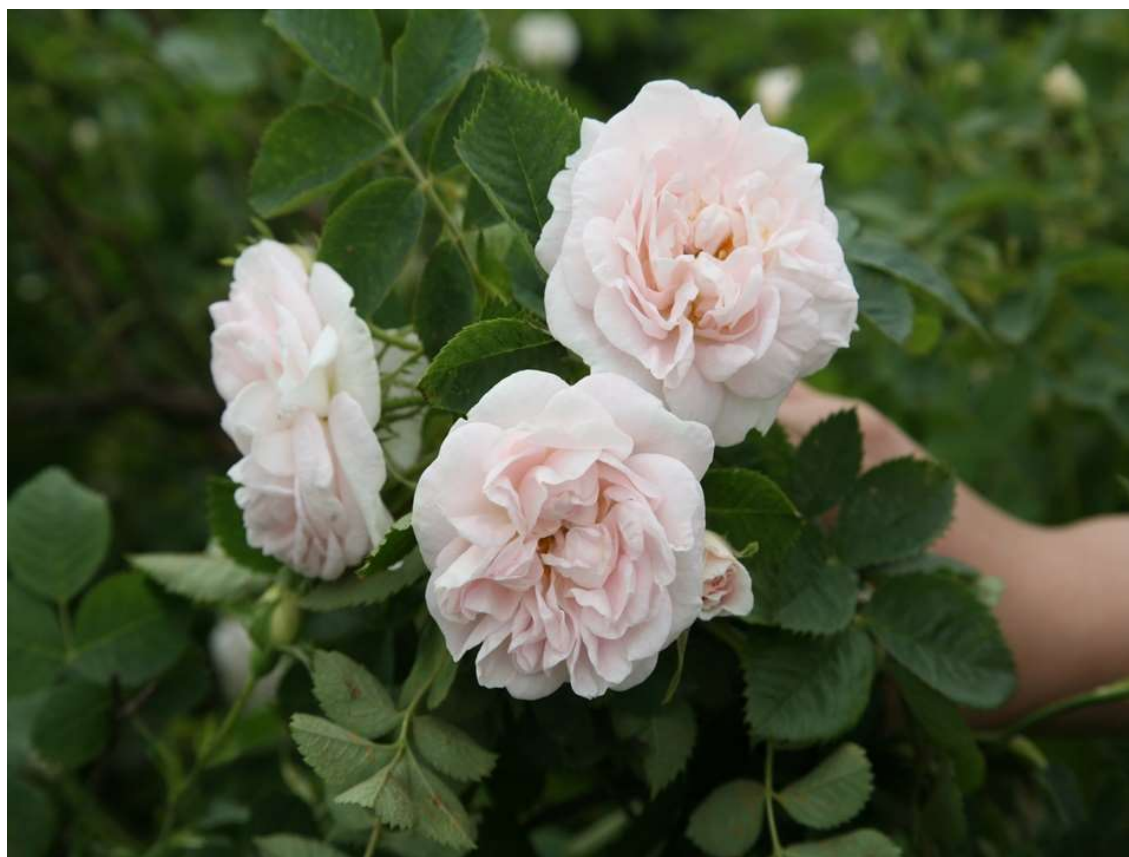

b) *R.centifolia*

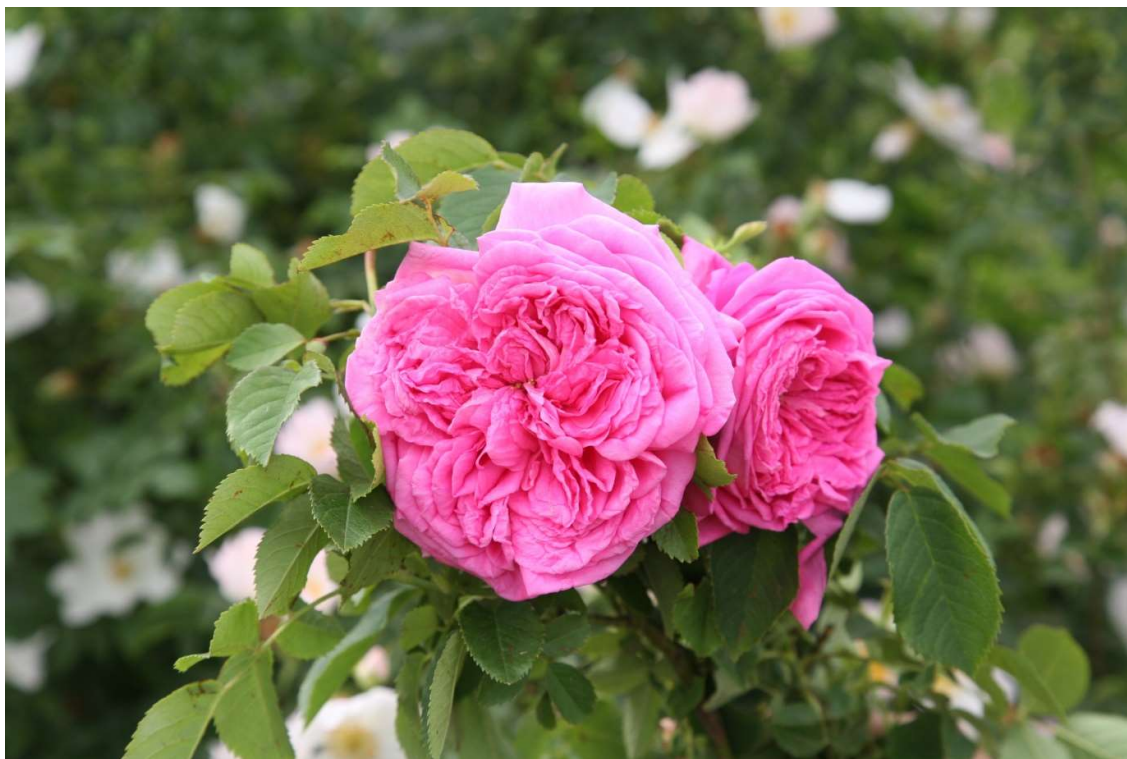

c) *R.damascena*

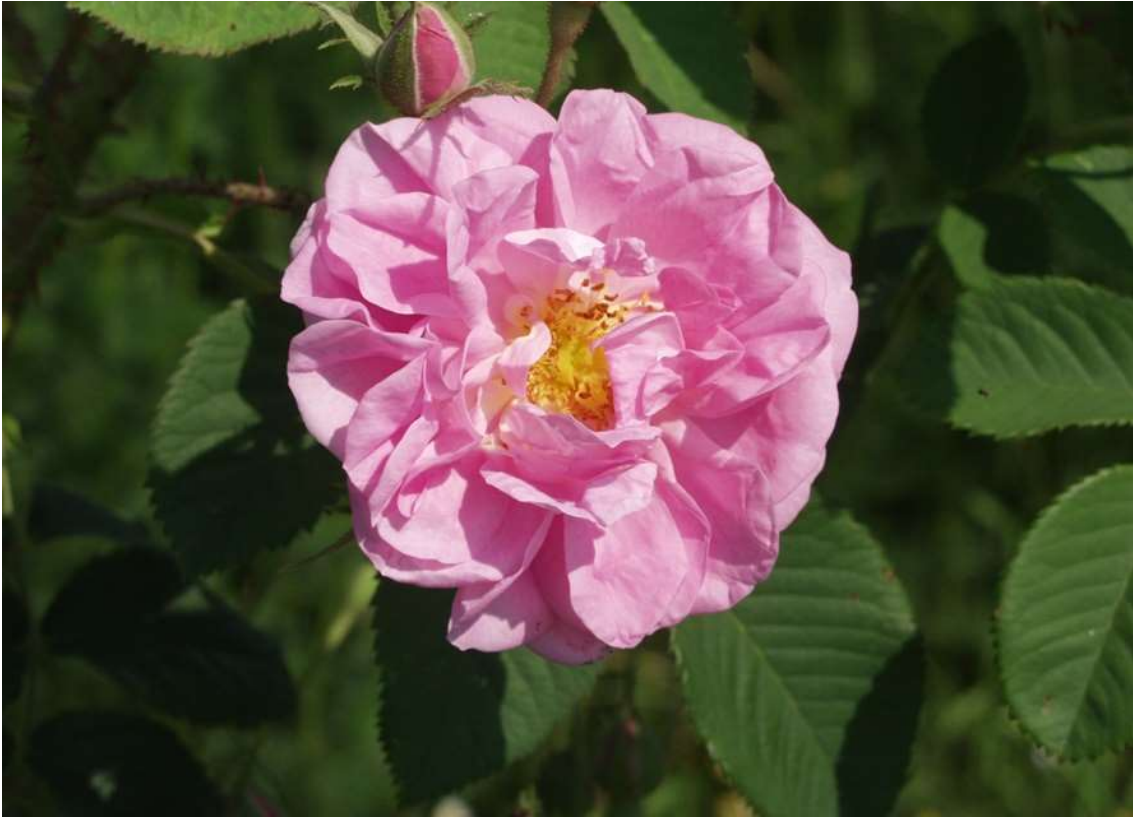

d) *R.gallica*

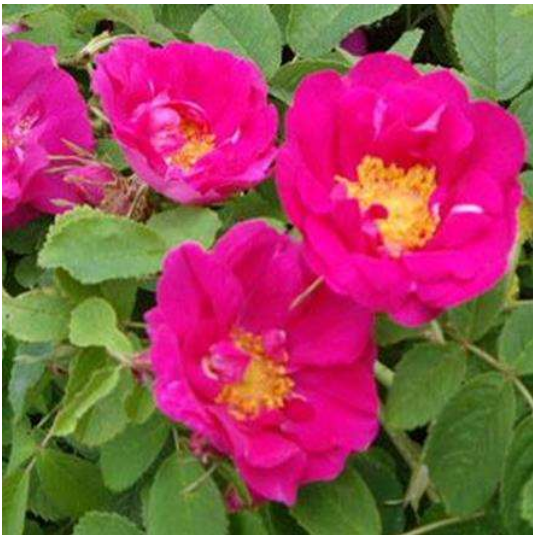

Figure S2. *R.damascena* raw material.

a) *R.damascena* fresh flowers

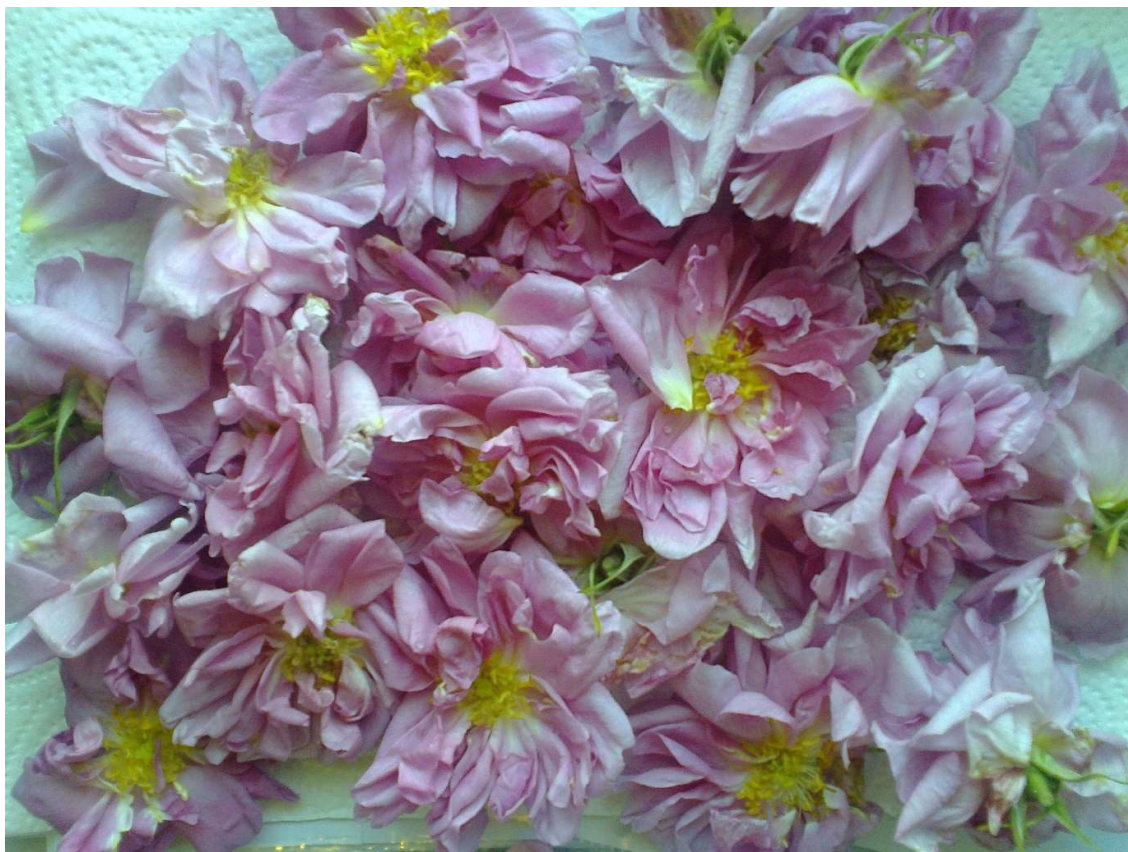

b) *R.damascena* exhausted flowers

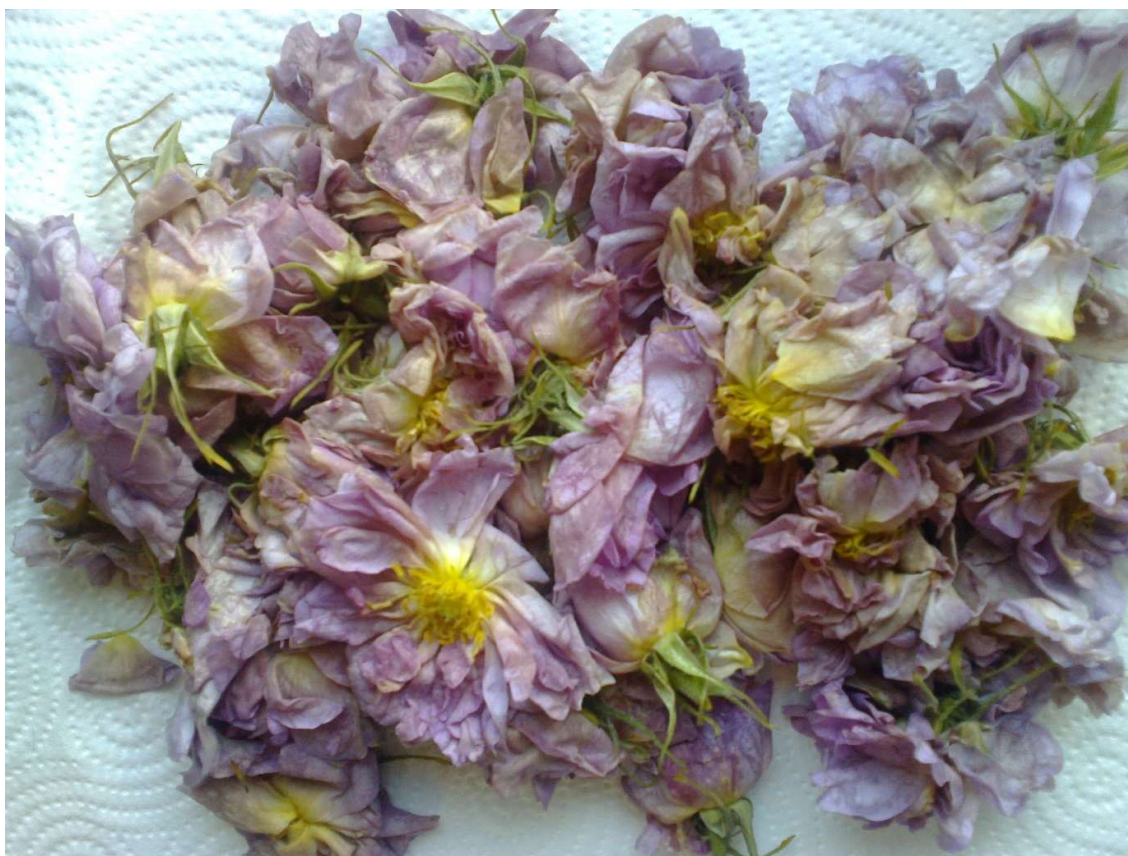

Fig.S3 *R.damascena* aroma products (from left to right – rose absolute, derived by traditional method, essential oil and subcritical extract)

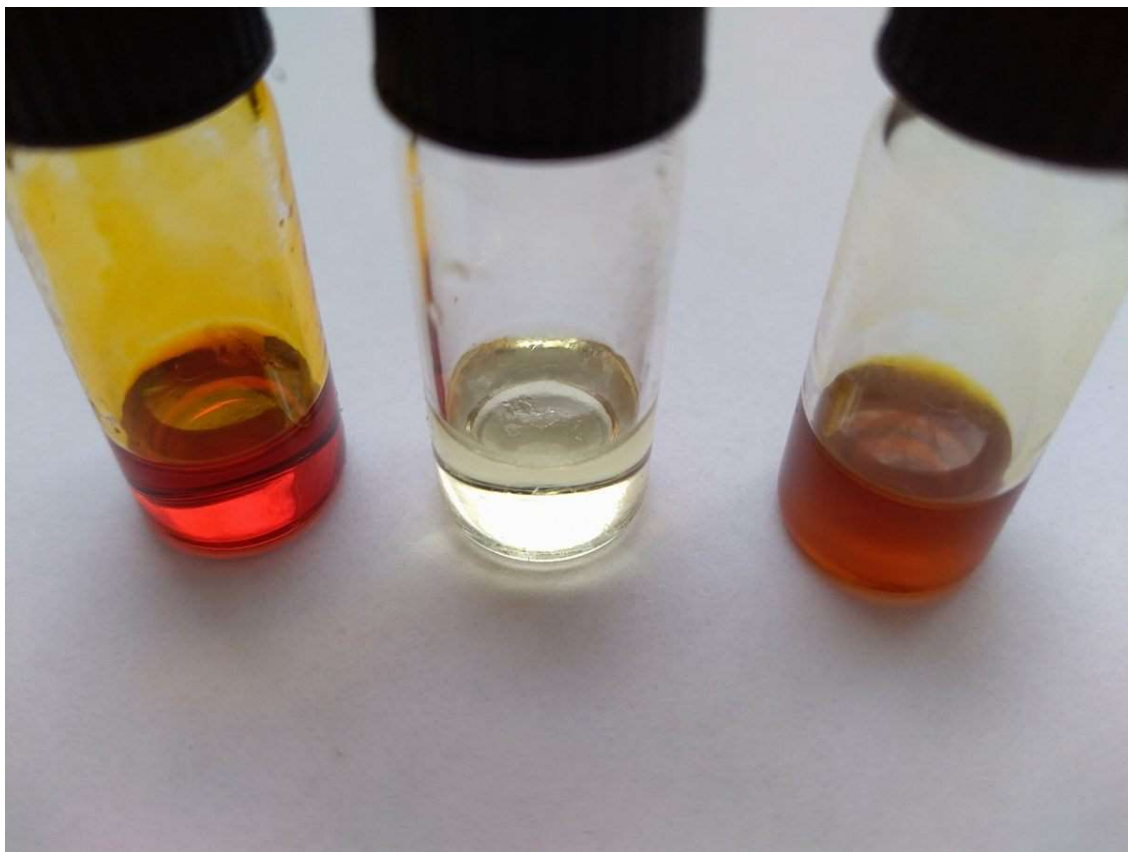

Supplement: s1 [file s1]
